# Supplementary material for: Routine patient-reported experience measurement of shared decision-making in the USA: a qualitative study of the current state according to frontrunners
Source: PubMed Central journal article supplement — BMJ Open. 2020 Jun 7;10(6):e037087. doi: 10.1136/bmjopen-2020-037087 (PMC7282390; doi:10.1136/bmjopen-2020-037087), 2020-06-07
Supplement: bmjopen-2020-037087supp002.pdf [file bmjopen-2020-037087supp002.pdf]

**Your organization's SDM measurement:**

Which patient-reported measures specific to shared decision-making does your organization collect?  
How are they administered?

---

---

---

---

---

How were the measures selected?

---

---

---

---

---

Why did your organization decide to measure shared decision-making?

---

---

---

---

---

Approximately how many patient reports about shared decision-making does your organization gather each month/year?

---

What, if any, concerns about shared decision-making measurement have you heard within your organization? Who voices these concerns?

---

---

---

---

---

How does your organization use the data it collects about shared decision-making performance?

---

---

---

---

---

What is the name of your organization?

---

How may I refer to your organization in reports about this research? (E.g. by name, a brief description, etc.)

---

---

---

---

---
