# Supplementary material for: Routine patient-reported experience measurement of shared decision-making in the USA: a qualitative study of the current state according to frontrunners
Source: PubMed Central journal article supplement — BMJ Open. 2020 Jun 7;10(6):e037087. doi: 10.1136/bmjopen-2020-037087 (PMC7282390; doi:10.1136/bmjopen-2020-037087), 2020-06-07
Supplement: bmjopen-2020-037087supp003.pdf [file bmjopen-2020-037087supp003.pdf]

## Appendix 3. Patient-reported SDM measures used in this sample

| SDM-Q-9                                                                                                                                                                                                                                                                                                                                                                                                                                                                                                                                                                                                                                                                           | collaboRATE                                                                                                                                                                                                                                                                           | Decision Quality Instrument <sup>a</sup>                                                                                                                                                                                                                                                                                                                                                                                                                                                                                                                                                                                                                                                                                                                                                                                                                                                                                                                                                                                                                                                                                                                                                                       |
|-----------------------------------------------------------------------------------------------------------------------------------------------------------------------------------------------------------------------------------------------------------------------------------------------------------------------------------------------------------------------------------------------------------------------------------------------------------------------------------------------------------------------------------------------------------------------------------------------------------------------------------------------------------------------------------|---------------------------------------------------------------------------------------------------------------------------------------------------------------------------------------------------------------------------------------------------------------------------------------|----------------------------------------------------------------------------------------------------------------------------------------------------------------------------------------------------------------------------------------------------------------------------------------------------------------------------------------------------------------------------------------------------------------------------------------------------------------------------------------------------------------------------------------------------------------------------------------------------------------------------------------------------------------------------------------------------------------------------------------------------------------------------------------------------------------------------------------------------------------------------------------------------------------------------------------------------------------------------------------------------------------------------------------------------------------------------------------------------------------------------------------------------------------------------------------------------------------|
| <p>My doctor made clear that a decision needs to be made.</p> <p>My doctor wanted to know exactly how I want to be involved in making the decision.</p> <p>My doctor told me that there are different options for treating my medical condition.</p> <p>My doctor precisely explained the advantages and disadvantages of the treatment options.</p> <p>My doctor helped me understand all the information.</p> <p>My doctor asked me which treatment option I prefer.</p> <p>My doctor and I thoroughly weighed the different treatment options.</p> <p>My doctor and I selected a treatment option together.</p> <p>My doctor and I reached an agreement on how to proceed.</p> | <p>How much effort was made to help you understand your health issues?</p> <p>How much effort was made to listen to the things that matter most to you about your health issues?</p> <p>How much effort was made to include what matters most to you in choosing what to do next?</p> | <p>How important is it to you to...</p> <ul style="list-style-type: none"> <li>- relieve your [specific type of] pain?</li> <li>- not be limited in what you can do because of your [specific type of] pain?</li> <li>- <u>avoid</u> a treatment with a long recovery time?</li> <li>- <u>avoid</u> having [specific type of] surgery?</li> <li>- <u>avoid</u> taking pain medicine for a long time?</li> </ul> <p>Which treatment do you want to do to treat your [condition]?</p> <p>[Five knowledge items specific to the patient's health condition and possible treatment options]</p> <p>Did any of your health care providers talk about [specific type of] surgery as an option for you?</p> <p>How much did you and your health care providers talk about the reasons to have [specific type of] surgery?</p> <p>How much did you and your health care providers talk about the reasons <b>not</b> to have [specific type of] surgery?</p> <p>Did any of your health care providers talk about non-surgical treatments as something that you should seriously consider?</p> <p>Did any of your health care providers ask <u>you</u> whether you wanted to have [specific type of] surgery or not?</p> |

<sup>a</sup> See [23] and [24] for full condition-specific instruments.
